# Supplementary material
Source: publisher figshare collection journal article supplement (https://karger.figshare.com/ndownloader/files/27698673)
Supplement: Supplementary file 1 [file 27698673]

SUPPLEMENTAL MATERIAL

| Supplemental table Ⅰ. Clinical characteristics among patients with putaminal, thalamic, or lobar hemorrhage. | | | | | |
| --- | --- | --- | --- | --- | --- |
| Variables | Putamen | Thalamus | Lobar | Others | p |
| n=158 | n=156 | n=78 | n=52 |
| Female sex, n (%) | 43 (27) | 59 (38) | 40 (51) | 14 (27) | 0.002 |
| Age, years, median (IQR) | 62 (55-70) | 72 (65-79) | 77 (67-83) | 67 (58-81) | <0.001 |
| Body mass index, kg/m2, median (IQR) | 22.6 (20.7-25.5) | 22.1 (20.4-25.5) | 22.2 (19.2-25.0) | 22.9 (21.0-26.0) | 0.440 |
| Prior history of ischemic stroke, n (%) | 15 (10) | 15 (10) | 9 (12) | 7 (14) | 0.831 |
| Prior history of hemorrhagic stroke, n (%) | 16 (10) | 11 (7) | 7 (9) | 2 (4) | 0.485 |
| Prior history of vascular disease, n (%) | 5 (3) | 12 (8) | 3 (4) | 2 (4) | 0.273 |
| Vascular risk factors, n (%) |  |  |  |  |  |
| Hypertension | 141 (89) | 134 (86) | 58 (74) | 45 (87) | 0.024 |
| Diabetes mellitus | 25 (16) | 30 (19) | 15 (19) | 11 (21) | 0.785 |
| Hyperlipidemia | 47 (30) | 45 (29) | 23 (30) | 9 (17) | 0.343 |
| Current smoking | 56 (35) | 51 (33) | 15 (19) | 17 (33) | 0.081 |
| Daily alcohol intake | 93 (59) | 85 (55) | 25 (32) | 25 (48) | 0.001 |
| Premorbid antithrombotic treatment, n (%) | 25 (16) | 42 (27) | 23 (30) | 15 (29) | 0.036 |
| Preadmission mRS, median (IQR) | 0 (0-0) | 0 (0-0) | 0 (0-1) | 0 (0-0) | 0.276 |
| Systolic BP on arrival, mmHg, median (IQR) | 183 (167-203) | 184 (159-210) | 172 (156-196) | 186 (165-209) | 0.018 |
| Diastolic BP on arrival, mmHg, median (IQR) | 104 (90-117) | 104 (90-117) | 96 (80-109) | 103 (91-113) | 0.015 |
| Initial NIHSS score, median (IQR) | 13 (5-17) | 8 (3-14) | 4 (1-16) | 4 (1-8) | <0.001 |
| Initial hematoma volume, ml, median (IQR) | 12.1 (4.68-23.3) | 4.95 (2.50-8.00) | 17.8 (8.24-52.4) | 2.95 (1.00-7.75) | <0.001 |
| Biochemistry sign at admission, median (IQR) |  |  |  |  |  |
| Hemoglobin, g/dl | 14.2 (13.1-16.3) | 14.0 (13.0-15.0) | 12.8 (11.7-14.8) | 14.0 (11.9-15.9) | 0.006 |
| Platelet count, 104/μl | 21.1 (17.3-24.7) | 21.8 (18.2-25.7) | 20.2 (17.1-24.8) | 19.9 (15.1-24.7) | 0.287 |
| Total cholesterol, mg/dl | 194 (166-225) | 192 (170-216) | 183 (159-210) | 189 (167-212) | 0.553 |
| eGFR, ml/min | 73 (59-83) | 67 (52-82) | 66 (57-84) | 68 (51-80) | 0.171 |
| Total small vessel disease score, median (IQR) | 2 (1-3) | 2 (2-3) | 2 (1-2) | 2 (2-3) | <0.001 |
| mRS at discharge, median (IQR) | 4 (2-5) | 4 (3-4) | 3 (2-5) | 3 (2-4) | 0.103 |
|  |  |  |  |  |  |
| mRS, modified Rankin scale; BP, blood pressure; NIHSS, National Institutes of Health Stroke Scale; eGFR, estimate glomerular filtration rate. | | | | | |
|  |

| Supplemental Table Ⅱ. Distribution of small vessel diseases according to hematoma location.* | | |  |  |  |
| --- | --- | --- | --- | --- | --- |
| Variables | Putamen | Thalamus | Lobar | Others | p |
| n=112 | n=118 | n=73 | n=41 |
| Severe† WMH, n (%) | 59 (53) | 87 (74) | 55 (75) | 30 (73) | 0.001 |
| Deep WMH (Fazekas scale,19 median [IQR]) | 2 (1-2) | 2 (1-3) | 2 (2-2) | 2 (1-3) | <0.001 |
| Periventricular WMH (Fazekas scale,19 median [IQR]) | 1 (1-2) | 2 (1-2) | 2 (1-2) | 2 (1-2) | <0.001 |
| Presence of any MBs, n (%) | 69 (62) | 94 (80) | 36 (49) | 31 (76) | <0.001 |
| Presence of deep MBs, n (%) | 52 (46) | 78 (66) | 24 (33) | 27 (66) | <0.001 |
| Presence of lobar MBs, n (%) | 35 (31) | 54 (46) | 28 (38) | 20 (49) | 0.085 |
| Presence of infratentorial MBs, n (%) | 38 (34) | 61 (52) | 14 (19) | 17 (42) | <0.001 |
| Presence of lacunes, n (%) | 34 (30) | 45 (38) | 17 (23) | 15 (37) | 0.165 |
| Prominent‡ ePS at basal ganglia, n (%) | 45 (40) | 61 (52) | 24 (33) | 18 (44) | 0.070 |
| ePS at basal ganglia (scale by Doubal et al.,21 median [IQR]) | 1 (1-2) | 2 (1-2) | 1 (1-2) | 1 (1-2) | 0.128 |
| ePS at central semiovale (scale by Doubal et al.,21 median [IQR]) | 2 (1-3) | 2 (1-2) | 2 (1-2) | 2 (1-2) | 0.344 |
|  |  |  |  |  |  |
| * Only patients with magnetic resonance imaging with sufficient sequences during admission. † Periventricular (Fazekas grade 2 or 3) and/or deep white matter (Fazekas grade 3) hyperintensities. ‡ Grade 2-4 (scale by Doubal et al.21)  WMH, white matter hyperintensity; MB, microbleed; ePS, enlarged perivascular space. | | | | | |
|  |
|  |
|  |
|  |

| Supplemental Table Ⅲ. Multivariate logistic regression model for associated factors with putaminal, thalamic, and lobar hemorrhage using modified SVD score. | | | | | | | | |
| --- | --- | --- | --- | --- | --- | --- | --- | --- |
|  |  |  |  |  |  |  |  |  |
|  | Dependent variable | Putaminal hemorrhage | | Thalamic hemorrhage | | Lobar hemorrhage | |  |
| Independent variables |  | OR (95% CI) | p | OR (95% CI) | p | OR (95% CI) | p |  |
| Female sex | | 1.09 (0.60-1.96) | 0.780 | 1.40 (0.77-2.55) | 0.270 | 1.39 (0.68-2.82) | 0.368 |  |
| Age (per 10 years) | | 0.59 (0.46-0.75) | <0.001 | 1.21 (0.95-1.56) | 0.128 | 1.55 (1.13-2.11) | 0.006 |  |
| Hypertension | | 0.51 (0.24-1.08) | 0.078 | 1.25 (0.61-2.53) | 0.546 | 1.97 (0.91-4.25) | 0.086 |  |
| Current smoking | | 0.75 (0.43-1.31) | 0.306 | 1.38 (0.78-2.44) | 0.267 | 0.99 (0.46-2.12) | 0.980 |  |
| Daily alcohol intake | | 1.80 (1.04-3.11) | 0.036 | 1.10 (0.62-1.92) | 0.750 | 0.63 (0.32-1.24) | 0.180 |  |
| Premorbid antithrombotic treatment | | 0.55 (0.28-1.07) | 0.078 | 1.06 (0.58-1.93) | 0.845 | 1.41 (0.68-2.94) | 0.355 |  |
| Systolic BP on arrival (per 10 mmHg) | | 0.93 (0.81-1.06) | 0.280 | 1.03 (0.90-1.18) | 0.696 | 0.87 (0.73-1.04) | 0.114 |  |
| Hematoma volume (per 10 ml) | | 1.06 (0.97-1.17) | 0.212 | 0.50 (0.38-0.67) | <0.001 | 1.43 (1.26-1.62) | <0.001 |  |
| Hemoglobin (per 1 g/dl) | | 1.01 (0.87-1.16) | 0.944 | 1.05 (0.90-1.22) | 0.547 | 1.00 (0.84-1.20) | 0.969 |  |
| Modified SVD score* (per 1 point) | | 0.92 (0.74-1.15) | 0.469 | 1.29 (1.03-1.61) | 0.029 | 0.73 (0.55-0.97) | 0.029 |  |
|  |  |  |  |  |  |  |  |  |
| * SVD burden score which removed the effect of lobar microbleeds (not add one point for microbleed when microbleed was located only in lobar) | | | | | | | | |
| BP, blood pressure; SVD, small vessel disease. | | | | | | | |  |

Supplemental Figure Ⅰ. Patients flow chart.


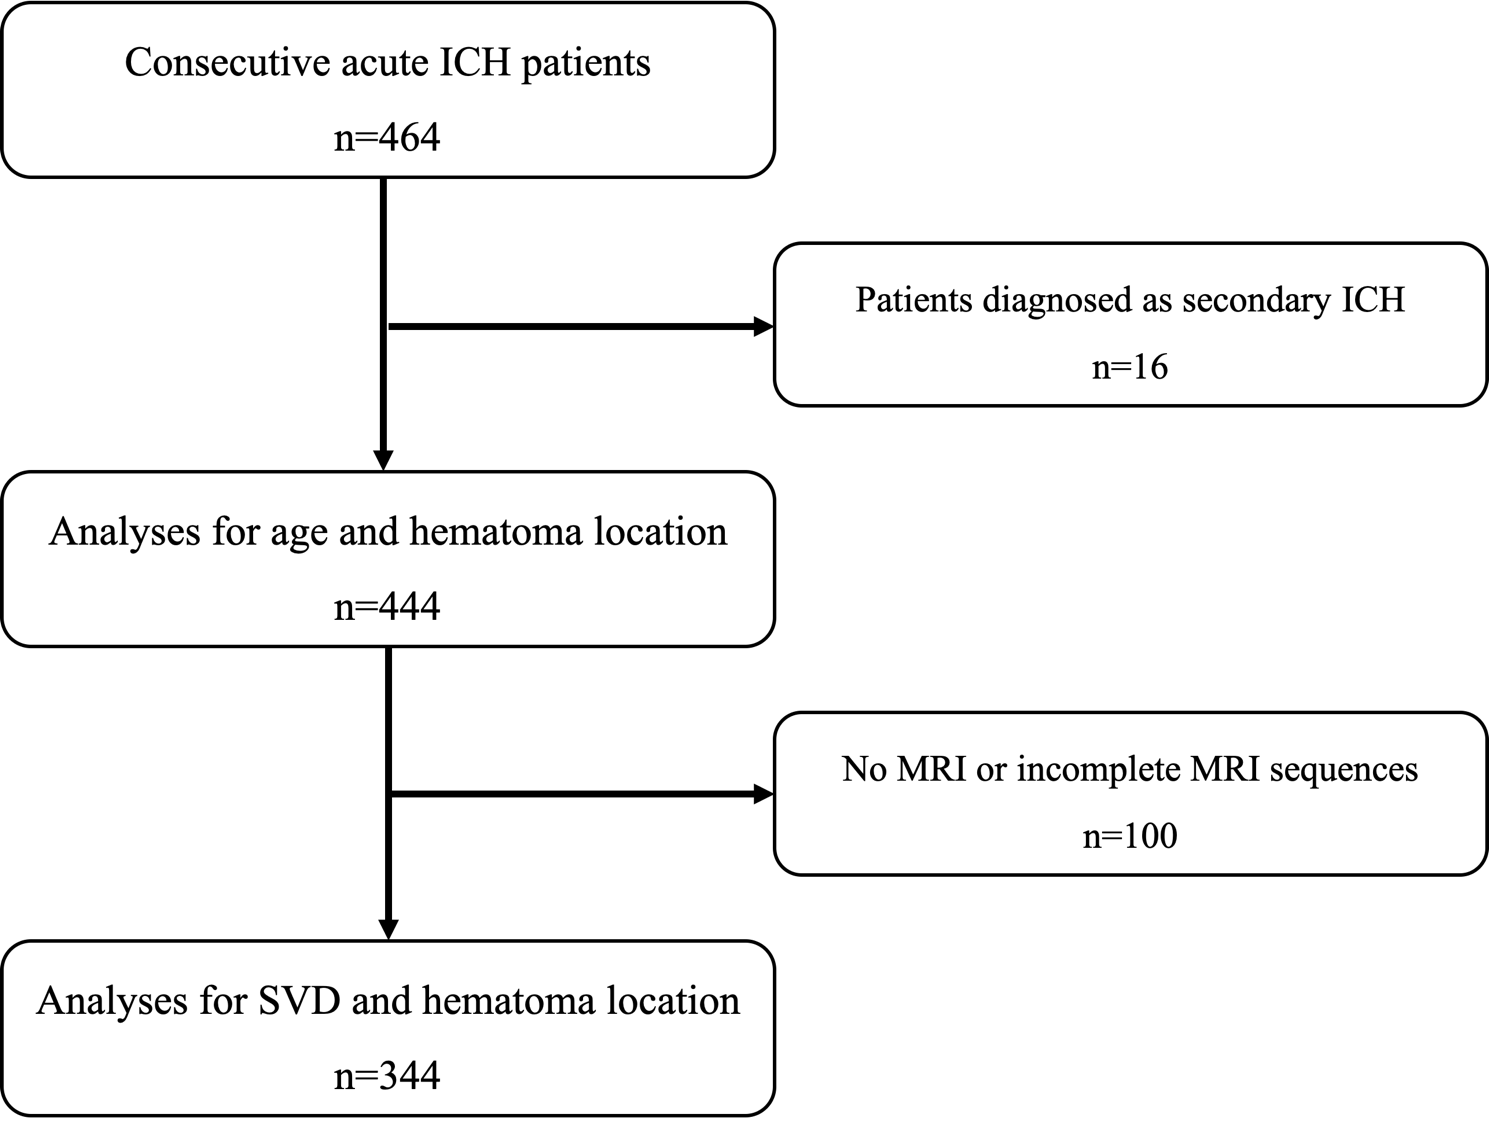


Supplemental Figure Ⅱ. Actual case numbers of putaminal, thalamic, and lobar hemorrhages stratified by patients’ age and SVD burden score.

SVD, small vessel disease.
